# Supplementary material
Source: ML conference proceedings conference paper supplement (https://openreview.net/forum?id=54-QTuqSLyn)
Supplement: supplementary_material [file attachment]

# README

We include three files –

- (A) A simple exhibitory ipython notebook with results replication 8 Gaussian toy dataset presented in appendix. This can be loaded in any notebook environment such as jupyter or google colab. All the results are saved therein as images + text. (iclr\_demo.ipynb)
- (B) A zip file containing full code for the project in form of three repositories – (1) GAN-CF replicating results on MNIST, Stacked MNIST, Toy synthetic datasets and DCGAN on CIFAR10 (2) SNGAN.PYTORCH contains code for SNGAN, ResNet, ResNet WGAN with all three implemented with DMAT procedure (3) BigGAN containing all the reported results with the model BigGAN (both with and without DMAT procedure)
- (C) The appendix.pdf file with extra information about experimental settings, environments, more results and visualizations.
